# Supplementary material for: Pressure-controlled crystallization of stereocomplex crystals in enantiomeric polylactides with remarkably enhanced hydrolytic degradation
Source: Royal Society of Chemistry journal article supplement (doi:10.1039/c8ce01199k), 2018-01-01
Supplement: c8ce01199k1.pdf [file c8ce01199k1.pdf]

## Supporting Information

### Pressure-controlled crystallization of stereocomplex crystals in enantiomeric polylactides with remarkably enhanced hydrolytic degradation

Huanhuan Zhang<sup>a</sup>, Chuanfeng Wang<sup>a</sup>, Yali Xu<sup>a</sup>, Xi Huang<sup>a</sup>, Xuebing He<sup>a</sup>, Chaoliang  
Zhang<sup>c</sup>, Jun Lu<sup>a, b, #, \*</sup>

<sup>a</sup> Key Laboratory of Advanced Technologies of Materials, Ministry of Education, School of  
Materials Science and Engineering, Southwest Jiaotong University, Chengdu 610031,  
Sichuan, China

<sup>b</sup> State Key Laboratory of Polymer Materials Engineering, Sichuan University, Chengdu  
610065, Sichuan, China

<sup>c</sup> State Key Laboratory of Oral Diseases, West China Hospital of Stomatology, Sichuan  
University, Chengdu 610041, Sichuan, China

---

# Other used names Jun Lv and Jun Lyu.

\* Corresponding author.

E-mail address: [junluprc@hotmail.com](mailto:junluprc@hotmail.com) (J. Lu).

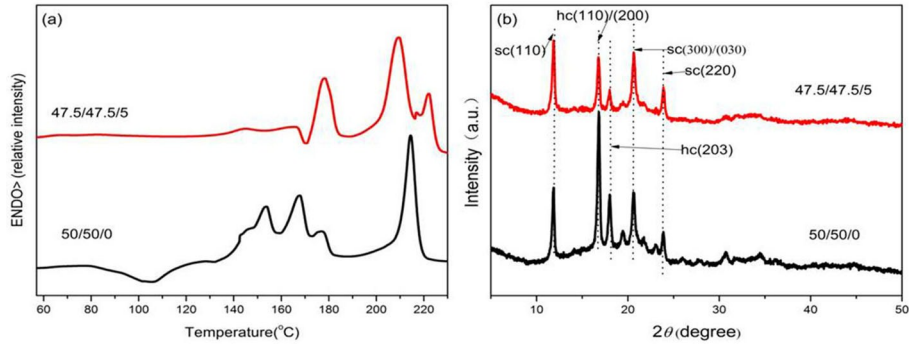

**Fig. S1.** DSC (a) and WAXD (b) profiles of PLLA<sub>x</sub>/PDLA<sub>y</sub>/PDLLA<sub>z</sub> blends with and without the introduction of PDLLA, respectively, crystallized at 200MPa, 180°C for 4h.

**Table S1.** DSC data of PLLA<sub>x</sub>/PDLA<sub>y</sub>/PDLLA<sub>z</sub> blends with and without the introduction of PDLLA, respectively, crystallized at 200MPa, 180°C for 4h.

| Conditions<br>(x/y/z) | T <sub>cc</sub><br>(°C) | ΔH <sub>cc</sub><br>(J/g) | T <sub>m</sub> (hc)<br>(°C) | ΔH <sub>m1</sub><br>(J/g) | T <sub>m</sub> (sc)<br>(°C) | ΔH <sub>m2</sub><br>(J/g) | f <sub>sc</sub><br>(%) | X <sub>sc</sub><br>(%) |
|-----------------------|-------------------------|---------------------------|-----------------------------|---------------------------|-----------------------------|---------------------------|------------------------|------------------------|
| 50/50/0               | 105.3                   | 7.4                       | 153.9,<br>167.7,<br>177.7   | 24.4                      | 214.5                       | 14.3                      | 45.6                   | 10.1                   |
| 47.5/47.5/5           | -                       | -                         | 178.2                       | 10.6                      | 209.5,<br>216.8,<br>222.1   | 20.5                      | 65.8                   | 15.2                   |
